# Supplementary material
Source: publisher figshare collection journal article supplement (https://karger.figshare.com/articles/dataset/_/5120965)
Supplement: Supplementary file 1 [file 1]

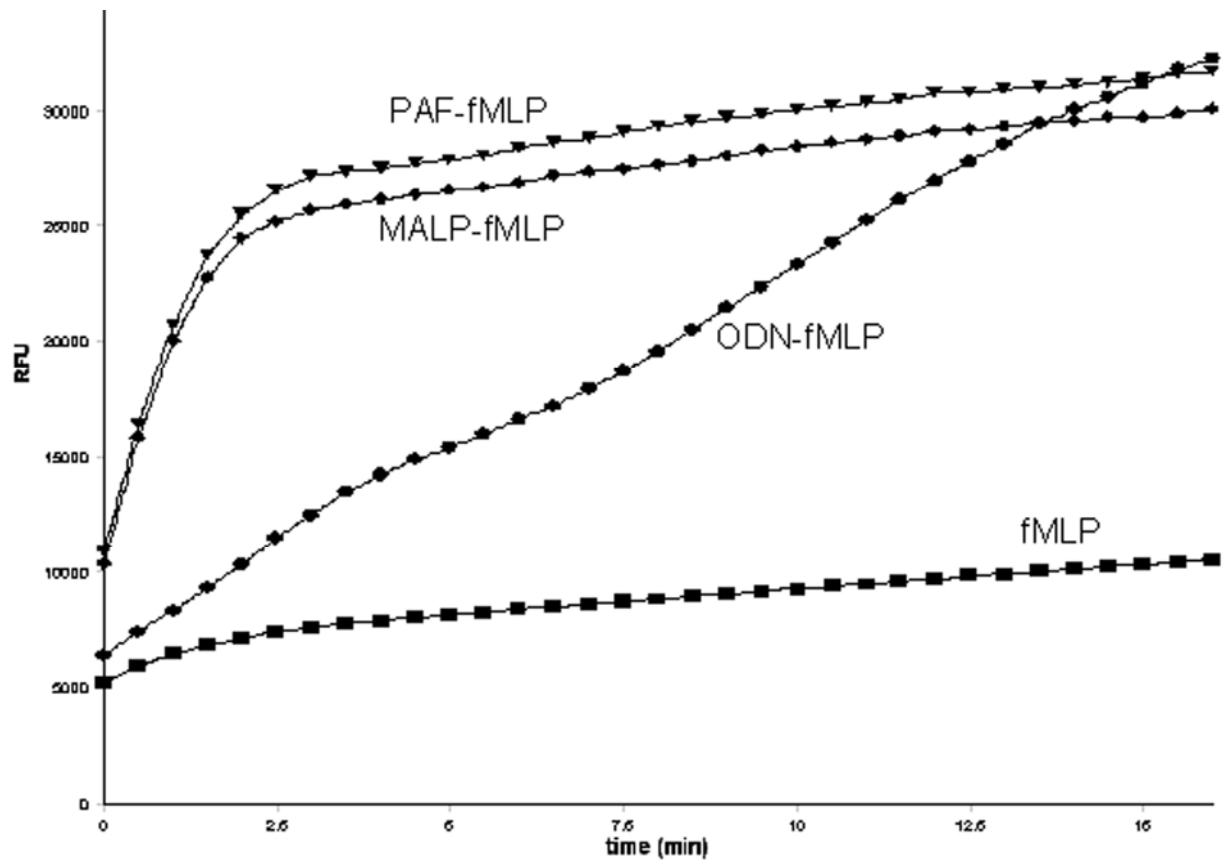

**Online Supplementary Supplementary Fig. 1.** ODN-CpG priming of the fMLP-induced respiratory burst. Neutrophils were primed with PAF, MALP-2, ODN-CpG or left unprimed, and subsequently stimulated with fMLP. Clearly, the kinetics of the ODN-CpG primed fMLP-induced burst are different from a classical PAF/fMLP-induced burst. Typical TLR-primed fMLP bursts, such as the MALP-2 primed burst, do show the same kinetics as the PAF/fMLP-induced burst.
