# Supplementary material
Source: publisher figshare collection journal article supplement (https://karger.figshare.com/articles/dataset/_/5120965)
Supplement: Supplementary file 2 [file 1]

**Online Supplementary Table 1.** Relative expression of mRNA

|               |               |
|---------------|---------------|
| TLR1          | 3.082.757.031 |
| TLR2          | 5.480.299.219 |
| TLR3          | 9.090.009     |
| TLR4          | 1.295.613.086 |
| TLR5          | 361.086.572   |
| TLR6          | 1.394.624.512 |
| TLR7          | 9.628.761     |
| TLR8          | 1.538.464.748 |
| TLR9          | 100.239.386   |
| TLR10         | 77.695.001    |
| control probe | 7.658.369     |

Relative mRNA levels of the indicated TLRs were measured by Agilent Whole Human Genome microarrays (Drewniak et al., Blood, 2009, April 6 (Epub ahead of print). Numbers represent the means of three individual donors. Expression of a non-specific control probe was also tested. In general, values below 50.000.000 indicate that a particular gene is not expressed.
